# Supplementary material for: Perioperative Outcomes, Comorbidities, and Complications following Total Shoulder Arthroplasty in Wheelchair Users: A Retrospective Cohort Analysis of a Nationwide Database
Source: MDPI journal article supplement (doi:10.3390/jcm12185799), 2023-09-06
Supplement: s1 [file s1]

Table S1: List of All CPT and ICD Codes Used

| CPT/ICD Defintion                               | Corresponding Code                                                                                                                                      |
|-------------------------------------------------|---------------------------------------------------------------------------------------------------------------------------------------------------------|
| <u>CPT Codes</u>                                |                                                                                                                                                         |
| Total Shoulder Arthroplasty                     | CPT-23472                                                                                                                                               |
| Reverese Total Shoulder Arthroplasty            | CPT-23472                                                                                                                                               |
| Wheelchair Users                                | CPT-97542                                                                                                                                               |
| <u>ICD-9 and ICD-10 Codes for Diagnoses</u>     |                                                                                                                                                         |
| Rotator Cuff Tear                               | ICD-10-D-M75100, ICD-10-D-M75101, ICD-10-D-M75102, ICD-10-D-M75110, ICD-10-D-M75111, ICD-10-D-M75112, ICD-10-D-M75120, ICD-10-D-M75121, ICD-10-D-M75122 |
| Glenohumeral Osteoarthritis                     | ICD-10-M19                                                                                                                                              |
| Wheelchair Users                                | ICD-10-D-Z993                                                                                                                                           |
| <u>ICD-9 and ICD-10 Codes for Comorbidities</u> |                                                                                                                                                         |
| Osteoarthritis                                  | ICD-9-D-71500:ICD-9-D-71599,ICD-10-D-M1911:ICD-10-D-M1993                                                                                               |
| Rheumatoid Arthritis                            | ICD-9-D-7140, ICD-9-D-7142, ICD-10-M0520:ICD-10-D-M061                                                                                                  |
| Asthma                                          | ICD-9-D-49300, ICD-9-D-49399, ICD-10-D-J452:ICD-10-D-J45988                                                                                             |
| Hypertension                                    | ICD-9-D-4010:ICD-9-D-4059, ICD-10-D-I10:ICD-10-D-I159                                                                                                   |

|                                       |                                                                                                                                                                                                                                                                          |
|---------------------------------------|--------------------------------------------------------------------------------------------------------------------------------------------------------------------------------------------------------------------------------------------------------------------------|
| Ischemic Heart Disease                | ICD-9-D-41000:ICD-9-D-41499, ICD-10-D-I21:ICD-10-D-I229                                                                                                                                                                                                                  |
| Pulmonary Heart Disease               | ICD-9-D-4150:ICD-9-D-41799, ICD-10-D-I26:ICD-10-D-I279                                                                                                                                                                                                                   |
| Obesity                               | ICD-9-D-2780, ICD-9-D-27800, ICD-9-D-27801, ICD-9-D-27802, ICD-9-D-27803, ICD-10-D-E660:ICD-10-D-E669                                                                                                                                                                    |
| Diabetes                              | ICD-9-D-24900:ICD-9-D-25099, ICD-9-D-7902, ICD-9-D-79021, ICD-9-D-79022, ICD-9-D-79029, ICD-9-D-7915, ICD-9-D-7916, ICD-10-D-E090:ICD-10-D-E139                                                                                                                          |
| Chronic Obstructive Pulmonary Disease | ICD-9-D-490:ICD-9-D-49699, ICD-10-D-J44:ICD-10-D-J449                                                                                                                                                                                                                    |
| Coronary Artery Disease               | ICD-9-D-4110:ICD-9-D-4149, ICD-10-D-I25:ICD-10-D-I259                                                                                                                                                                                                                    |
| Congestive Heart Failure              | ICD-9-D-39891, ICD-9-D-4280, ICD-9-D-4281, ICD-9-D-42820, ICD-9-D-42821, ICD-9-D-42822, ICD-9-D-42823, ICD-9-D-42830, ICD-9-D-42831, ICD-9-D-42832, ICD-9-D-42833, ICD-9-D-42840, ICD-9-D-42841, ICD-9-D-42842, ICD-9-D-42843, ICD-9-D-4289, ICD-10-D-I150:ICD-10-D-I159 |
| Chronic Kidney Disease                | ICD-9-D-585, ICD-9-D-5851, ICD-9-D-5852, ICD-9-D-5853, ICD-9-D-5854, ICD-9-D-5855, ICD-9-D-5856, ICD-9-D-5859, ICD-9-D-7925, ICD-10-D-N18:ICD-10-D-N189                                                                                                                  |
| Tobacco Use                           | ICD-9-D-3051, ICD-9-D-V1582, ICD-10-D-F17220, ICD-10-D-F17221, ICD-10-D-F17223, ICD-10-D-F17228, ICD-10-D-F17229, ICD-10-D-F17290, ICD-10-D-                                                                                                                             |

F17291, ICD-10-D-F17293, ICD-10-D-F17298, ICD-10-D-F17299, ICD-10-D-Z720

#### ICD-9 and ICD-10 Codes for Complications

|                         |                                                                                                                                                                                                                                                                                                                                                                                                                                                                         |
|-------------------------|-------------------------------------------------------------------------------------------------------------------------------------------------------------------------------------------------------------------------------------------------------------------------------------------------------------------------------------------------------------------------------------------------------------------------------------------------------------------------|
| Acute Kidney Injury     | ICD-9-D-5845, ICD-9-D-5846, ICD-9-D-5847, ICD-9-D-5848, ICD-9-D-5849, ICD-10-D-N17:ICD-10-D-N179                                                                                                                                                                                                                                                                                                                                                                        |
| Urinary Tract Infection | ICD-9-D-5990, ICD-10-D-N390                                                                                                                                                                                                                                                                                                                                                                                                                                             |
| Pneumonia               | ICD-9-D-4800:ICD-9-D-4809, ICD-9-D-481, ICD-9-D-4820, ICD-9-D-4821, ICD-9-D-48230, ICD-9-D-48231, ICD-9-D-48232, ICD-9-D-48239, ICD-9-D-48240, ICD-9-D-48241, ICD-9-D-48242, ICD-9-D-48249, ICD-9-D-48281, ICD-9-D-48282, ICD-9-D-48283, ICD-9-D-48284, ICD-9-D-48289, ICD-9-D-4829, ICD-9-D-4830, ICD-9-D-4831, ICD-9-D-4838, ICD-9-D-4841, ICD-9-D-4843, ICD-9-D-4845, ICD-9-D-4846, ICD-9-D-4847, ICD-9-D-4848, ICD-9-D-485, ICD-9-D-486, ICD-10-D-J12:ICD-10-D-J189 |
| Deep Vein Thrombosis    | ICD-9-D-4532, ICD-9-D-4533, ICD-9-D-4534, ICD-9-D-45382, ICD-9-D-45384, ICD-9-D-45385, ICD-9-D-45386, ICD-10-D-I26:ICD-10-D-I2699                                                                                                                                                                                                                                                                                                                                       |
| Wound Disruption        | ICD-9-D-99830, ICD-9-D-99831, ICD-9-D-99832, ICD-9-D-99833, ICD-10-D-T8130XA, ICD-10-D-T8130XD, ICD-10-D-T8130XS, ICD-10-D-T8131XA, ICD-10-D-T8131XD, ICD-10-D-T8131XS, ICD-10-D-T8132XA, ICD-10-D-T8132XD, ICD-10-D-T8132XS, ICD-10-D-T8133XA, ICD-10-D-T8133XD, ICD-10-D-T8133XS                                                                                                                                                                                      |

---
